# Supplementary material for: Polymorphism, phase transformation and energetic properties of 3-nitro-1,2,4-triazole
Source: Royal Society of Chemistry journal article supplement (doi:10.1039/c8ra04116d), 2018-01-01
Supplement: c8ra04116d1.pdf [file c8ra04116d1.pdf]

## Supporting Information

### Polymorphism, Phase Transformation and Energetic Properties of 3-Nitro-1,2,4-triazole

Pengcheng Zhang<sup>1</sup>, XiuXiu Zhao<sup>1</sup>, Yao Du<sup>1</sup>, Michael Gozin<sup>2</sup>, Shenghua Li\*<sup>1</sup>, Siping Pang\*<sup>1</sup>  
<sup>1</sup>School of Material Science & Engineering, Beijing Institute of Technology, Beijing 100081, China  
<sup>2</sup>School of Chemistry, Faculty of Exact Science, Tel Aviv University, Tel Aviv, 69978, Israel

E-mail: pangsp@bit.edu.cn ;lishenghua@bit.edu.cn

**Table S1:** 3-Nitro-1,2,4-triazole crystallized from various solvents

| Solvent                                   | Solubility | Crystallization method | Crystal Form |
|-------------------------------------------|------------|------------------------|--------------|
| methanol                                  | Soluble    | SE                     | Form I       |
| acetone                                   | Soluble    | SE                     | Form I       |
| ethanol                                   | Soluble    | SE                     | Form I       |
| ethyl acetate                             | Soluble    | SE                     | Form I       |
| <b>Mixture of Solvents in a 1:1 ratio</b> |            |                        |              |
| Methanol & Ethyl acetate                  | Soluble    | SE                     | Form I       |

SE – Slow Evaporation at room temperature

**Table S2:** 3-Nitro-1,2,4-triazole crystallized from various solvents and additive

| Solvent                           | Component 2       | Crystallization method | Crystal Form   |
|-----------------------------------|-------------------|------------------------|----------------|
| methanol                          | hydrazine hydrate | SE                     | Form I         |
| methanol                          | hydroxylamine     | SE                     | Form I         |
| acetone                           | dichloromethane   | SE                     | Form I         |
| methanol & ethyl acetate<br>(1:1) | hydrazine hydrate | SE                     | Form I         |
| methanol & ethyl acetate<br>(1:1) | hydroxylamine     | SE                     | <b>Form II</b> |

**Table S3.** Hydrogen Bond Parameters (distances, Å and angles, deg)

|         | Form I |          | Form II |          |
|---------|--------|----------|---------|----------|
|         | D...A  | ∠D-H...A | D...A   | ∠D-H...A |
| N-H...O | 3.2385 | 114.979  | 3.3734  | 116.402  |
|         | 3.4087 | 108.694  | 3.0887  | 118.364  |
|         | 3.8411 | 111.549  | 3.0599  | 117.368  |
|         |        |          | 3.2057  | 105.560  |
| C-H...O | 3.3945 | 130.188  | 3.5083  | 145.183  |
|         | 3.2799 | 133.444  | 3.3483  | 116.837  |
|         | 3.1501 | 121.667  | 3.1150  | 123.078  |
|         |        |          | 3.3863  | 141.716  |
|         |        |          | 3.4732  | 112.768  |
|         |        |          | 3.0489  | 116.884  |

**Table S4.** Transition temperatures (°C) observed for the polymorphic transformation in different methods.

| Crystal Forms | DSC          | TG           | Variable Temp<br>PXRD | SCSC<br>Reactivity |
|---------------|--------------|--------------|-----------------------|--------------------|
| I             | Not observed | Not observed | Not observed          | Not observed       |
| II → I        | 98           | 98           | 98-115                | 98-115             |

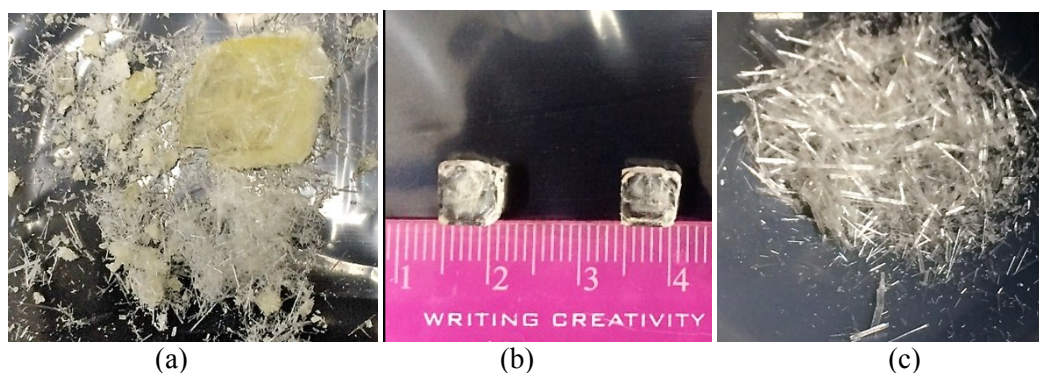

Figure S1: polymorphs of 3-Nitro-1,2,4-triazole (a) Forms I (tetragonal) and II (monoclinic); (b) isolated single crystals of Forms I of 3-Nitro-1,2,4-triazole. (c) isolated single crystals of Forms II of 3-Nitro-1,2,4-triazole.

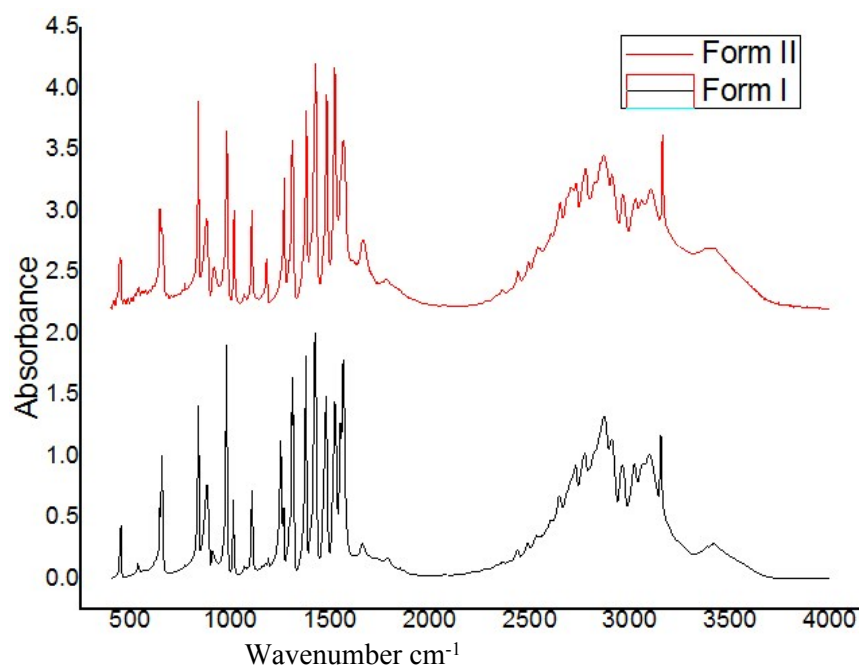

Figure S2: IR spectra of the 3-Nitro-1,2,4-triazole : Forms I and Forms II.
